# Supplementary material for: In Vivo Cancer Targeting and Imaging-Guided Surgery with Near Infrared-Emitting Quantum Dot Bioconjugates
Source: PubMed Central journal article supplement — Theranostics. 2012 Aug 7;2(8):769–76. doi: 10.7150/thno.4690 (PMC3425123; doi:10.7150/thno.4690), 2012-08-07
Supplement: thnov02p0769s4.pdf [file thnov02p0769s4.pdf]

## Supplementary Materials

### ***In vivo* cancer targeting and imaging-guided surgery with near infrared-emitting quantum dot bioconjugates**

Yan Li, <sup>a, 1</sup> Zhe Li, <sup>b, 1</sup> Xiaohui Wang, <sup>c</sup> Fengjun Liu, <sup>c</sup> Yingsheng Cheng, <sup>c</sup> Bingbo Zhang, <sup>d,\*</sup> and Donglu Shi <sup>d, e</sup>

<sup>a</sup> Translational Medicine Research Centre & Central Laboratory, Shanghai First Maternity and Infant Hospital, Tongji University School of Medicine, Shanghai, 200040, P.R. China.

<sup>b</sup> Department of Thyroid and Breast Surgery, the Tenth People' s Hospital of Shanghai, Tongji University, Shanghai 200072, P. R. China

<sup>c</sup> Medical Imaging Center, the Tenth People's Hospital of Shanghai, Tongji University, Shanghai 200072, P. R. China.

<sup>d</sup> The Institute for Advanced Materials and Nano Biomedicine, Tongji University, Shanghai, 200092, P. R. China.

<sup>e</sup> School of Electronic and Computing Systems, University of Cincinnati, Cincinnati, Ohio 45221, USA.

<sup>1</sup>These two authors contribute equally to this study.

\*To whom correspondence should be addressed.

Bingbo Zhang: [bingbozhang@tongji.edu.cn](mailto:bingbozhang@tongji.edu.cn).

Tel: (+) 86-21-65983706-819. Fax: (+) 86-21-65983706-0.

### **Cytotoxicity assay**

The in vitro cytotoxicity was measured using 3-(4, 5-dimethylthiazol-2-yl)-2, 5-diphenyltetrazolium bromide (MTT) assay. L929 cells growing in log phase were seeded into a 96-well cell-culture plate at  $5 \times 10^3$ /well and then incubated for 24 h at 37 °C under 5% CO<sub>2</sub>. DMEM supplemented with 10% FBS (Fetal Bovine Serum) solutions of QDs (100 µL/well, containing 1% HEPES) at different concentrations were added to the wells of the treatment group, and DMEM containing 1% HEPES (100 µL/well) to the negative control group, respectively. The cells were incubated for 24 h at 37 °C under 5% CO<sub>2</sub>. Subsequently, 10 µL MTT (5 mg/mL) was added to each well and incubated for an additional 4 h at 37 °C under 5% CO<sub>2</sub>. After the addition of dimethylsulfoxide (DMSO, 150 µL/well), the assay plate was allowed to stand at room temperature for 10 minutes. A Tecan Infinite M200 monochromator-based multi-function microplate reader was used to measure the OD570 (A value) of each well with background subtraction at 690 nm. The following formula was used to calculate the viability of cell growth: cell viability (%) = (mean of A value of treatment group/mean of A value of control) X 100.
